# Supplementary material for: Use of Electronic Nicotine Delivery Systems (ENDS) in China: Evidence from Citywide Representative Surveys from Five Chinese Cities in 2018
Source: MDPI journal article supplement (doi:10.3390/ijerph17072541), 2020-04-08
Supplement: s1 [file s1]

Article

# Use of Electronic Nicotine Delivery Systems (ENDS) in China: Evidence from Citywide Representative Surveys from Five Chinese Cities in 2018

Jidong Huang <sup>1,\*</sup>, Zongshuan Duan <sup>1</sup>, Yu Wang <sup>1</sup>, Pamela B. Redmon <sup>2</sup> and Michael P. Eriksen <sup>1</sup>

<sup>1</sup> School of Public Health, Georgia State University, Atlanta, GA 30303, USA; zduan3@student.gsu.edu (Z.D.); ywang145@student.gsu.edu (Y.W.); meriksen@gsu.edu (M.P.E.)

<sup>2</sup> Global Health Institutes, Emory University, Atlanta, GA 30322, USA; pam.redmon@emory.edu

\* Correspondence: jhuang17@gsu.edu; Tel.: +1-404-413-9337

Received: 4 March 2020; Accepted: 5 April 2020; Published: date

## Supplementary Materials

Table S1: Awareness, ever use, and past-30-day use of ENDS among adult residents in five Chinese cities in 2018.

Table S2: Adjusted ORs of awareness, ever use, and past-30-day use of ENDS among adult residents in five Chinese cities in 2018.

Table S3: Awareness, ever use, and past-30-day use of ENDS among adult smokers in five Chinese cities in 2018.

Table S4: Adjusted ORs of awareness, ever use, and past-30-day use of ENDS among adult smokers in five Chinese cities in 2018.

**Table S1.** Awareness, ever use, and past-30-day use of Electronic Delivery Nicotine Systems (ENDS) among adult residents in five Chinese cities in 2018.

| Demographic Characteristics                  | Chengdu<br>(N = 1914) |           | Chongqing<br>(N = 1829) |           | Wuhan<br>(N = 2251) |           | Xiamen<br>(N = 2116) |           | Xi'an<br>(N = 2123) |           | Overall<br>(N = 10,233) |           |
|----------------------------------------------|-----------------------|-----------|-------------------------|-----------|---------------------|-----------|----------------------|-----------|---------------------|-----------|-------------------------|-----------|
|                                              | %                     | 95% CI    | %                       | 95% CI    | %                   | 95% CI    | %                    | 95% CI    | %                   | 95% CI    | %                       | 95% CI    |
| Awareness of ENDS                            |                       |           |                         |           |                     |           |                      |           |                     |           |                         |           |
| Total                                        | 55.9                  | 48.1–63.7 | 45.0                    | 38.6–51.4 | 46.7                | 38.6–54.7 | 49.9                 | 42.2–57.5 | 58.7                | 51.9–65.6 | 51.3                    | 48.0–54.6 |
| Sex                                          |                       |           |                         |           |                     |           |                      |           |                     |           |                         |           |
| Male                                         | 64.8                  | 57.4–72.1 | 49.1                    | 41.5–56.7 | 55.8                | 46.0–65.5 | 59.3                 | 50.5–68.2 | 69.4                | 60.3–78.6 | 59.4                    | 55.6–63.2 |
| Female                                       | 47.3                  | 38.3–56.2 | 40.7                    | 33.4–48.1 | 37.3                | 30.7–43.9 | 39.6                 | 30.7–48.4 | 47.6                | 39.8–55.5 | 43.0                    | 39.5–46.6 |
| Age (Years)                                  |                       |           |                         |           |                     |           |                      |           |                     |           |                         |           |
| 15–24                                        | 64.5                  | 53.3–75.7 | 58.2                    | 46.6–69.8 | 68.3                | 57.9–78.7 | 53.4                 | 38.6–68.2 | 62.3                | 52.4–72.2 | 61.1                    | 55.9–66.2 |
| 25–44                                        | 61.3                  | 51.1–71.6 | 56.4                    | 48.8–63.9 | 50.4                | 39.3–61.5 | 59.5                 | 52.5–66.4 | 65.6                | 58.5–72.7 | 59.0                    | 55.1–62.9 |
| 45–64                                        | 50.9                  | 43.5–58.2 | 34.7                    | 28.4–40.9 | 45.3                | 37.8–52.7 | 32.3                 | 21.4–43.2 | 54.9                | 45.9–64.0 | 44.0                    | 40.4–47.5 |
| 65 and above                                 | 31.1                  | 23.5–38.8 | 18.7                    | 11.9–25.6 | 22.0                | 15.0–29.0 | 11.3                 | 5.0–17.6  | 32.1                | 23.6–40.6 | 24.5                    | 21.1–27.9 |
| Education Level                              |                       |           |                         |           |                     |           |                      |           |                     |           |                         |           |
| Primary school completed or below            | 29.5                  | 19.3–39.6 | 12.7                    | 8.6–16.9  | 20.3                | 13.3–27.4 | 14.2                 | 9.7–18.6  | 43.2                | 26.9–59.5 | 21.2                    | 16.9–25.4 |
| Junior high school completed                 | 44.9                  | 38.4–51.5 | 30.3                    | 24.6–35.9 | 42.6                | 32.2–53.0 | 45.3                 | 36.4–54.1 | 51.5                | 43.4–59.7 | 41.0                    | 37.4–44.7 |
| Senior high school completed                 | 60.4                  | 50.3–70.4 | 49.8                    | 40.1–59.6 | 50.3                | 40.4–60.2 | 55.6                 | 44.5–66.7 | 54.7                | 44.9–64.5 | 53.8                    | 49.4–58.1 |
| College degree or above                      | 63.4                  | 53.9–72.9 | 61.6                    | 53.0–70.2 | 52.0                | 42.2–61.7 | 63.6                 | 54.8–72.3 | 64.6                | 55.2–74.1 | 61.6                    | 57.4–65.9 |
| Occupation                                   |                       |           |                         |           |                     |           |                      |           |                     |           |                         |           |
| Gov. employee, teacher, healthcare provider  | 63.5                  | 51.3–75.8 | 65.2                    | 55.4–75.1 | 47.5                | 35.9–59.1 | 37.6                 | 24.8–50.5 | 60.8                | 52.0–69.6 | 58.6                    | 53.3–63.9 |
| Factory, business, service industry employee | 63.4                  | 54.6–72.2 | 46.7                    | 39.2–54.2 | 55.9                | 46.2–65.6 | 60.6                 | 52.1–69.2 | 70.3                | 63.2–77.3 | 59.8                    | 56.0–63.6 |
| Not in the labor force <sup>1</sup>          | 46.8                  | 39.1–54.5 | 40.7                    | 32.7–48.6 | 39.6                | 31.8–47.4 | 39.3                 | 32.2–46.4 | 51.2                | 43.2–59.1 | 43.9                    | 40.3–47.5 |
| Current Smoking Status                       |                       |           |                         |           |                     |           |                      |           |                     |           |                         |           |
| Yes                                          | 75.5                  | 66.8–84.1 | 56.0                    | 46.0–66.1 | 65.3                | 56.5–74.1 | 65.2                 | 56.3–74.1 | 78.9                | 71.2–86.5 | 67.8                    | 63.7–72.0 |
| No                                           | 50.1                  | 42.5–57.8 | 41.5                    | 35.2–47.8 | 41.3                | 33.3–49.2 | 45.2                 | 37.5–52.9 | 52.7                | 45.3–60.2 | 46.3                    | 43.1–49.6 |
| Ever Use of ENDS                             |                       |           |                         |           |                     |           |                      |           |                     |           |                         |           |
| Total                                        | 4.6                   | 3.2–6.0   | 4.4                     | 2.9–5.9   | 3.7                 | 2.7–4.8   | 4.3                  | 2.9–5.6   | 6.6                 | 4.5–8.7   | 4.8                     | 4.1–5.5   |
| Sex                                          |                       |           |                         |           |                     |           |                      |           |                     |           |                         |           |
| Male                                         | 8.0                   | 5.5–10.6  | 7.2                     | 4.1–10.3  | 7.2                 | 5.7–8.7   | 7.6                  | 5.0–10.3  | 12.4                | 8.7–16.2  | 8.6                     | 7.2–9.9   |
| Female                                       | 1.3                   | 0.4–2.2   | 1.4                     | 0.0–2.92  | 0.2                 | 0.0–0.5   | 0.6                  | 0.0–1.4   | 0.6                 | 0.0–1.2   | 0.9                     | 0.5–1.4   |

|                                              |      |           |      |          |      |           |      |           |      |           |      |           |
|----------------------------------------------|------|-----------|------|----------|------|-----------|------|-----------|------|-----------|------|-----------|
| Age (Years)                                  |      |           |      |          |      |           |      |           |      |           |      |           |
| 15–24                                        | 3.6  | 0.9–6.2   | 5.7  | 1.4–10.0 | 6.1  | 3.4–8.7   | 5.5  | 1.0–10.1  | 7.2  | 2.6–11.8  | 5.6  | 3.8–7.5   |
| 25–44                                        | 5.7  | 3.4–7.9   | 5.0  | 2.1–8.0  | 4.6  | 2.7–6.5   | 4.9  | 3.4–6.4   | 8.0  | 4.7–11.2  | 5.7  | 4.6–6.8   |
| 45–64                                        | 4.7  | 2.9–6.5   | 3.9  | 1.6–6.2  | 3.1  | 1.9–4.4   | 2.3  | 1.0–3.5   | 6.0  | 4.1–8.0   | 4.2  | 3.3–5.1   |
| 65 and above                                 | 2.2  | 0.3–4.0   | 2.1  | 0.5–3.6  | 0.9  | 0.0–1.9   | 0.5  | 0.0–1.4   | 1.4  | 0.1–2.7   | 1.6  | 0.9–2.3   |
| Education Level                              |      |           |      |          |      |           |      |           |      |           |      |           |
| Primary school completed or below            | 0.4  | 0.0–1.3   | 1.8  | 0.0–3.7  | 1.3  | 0.0–3.0   | 0.3  | 0.0–0.7   | 2.4  | 0.0–5.2   | 1.2  | 0.4–2.0   |
| Junior high school completed                 | 4.5  | 2.7–6.4   | 4.1  | 1.0–7.1  | 4.0  | 1.1–7.0   | 4.2  | 1.1–7.3   | 6.4  | 2.9–10.0  | 4.5  | 3.2–5.8   |
| Senior high school completed                 | 4.7  | 2.5–6.8   | 4.4  | 1.4–7.3  | 3.4  | 2.0–4.7   | 7.1  | 4.3–10.0  | 4.9  | 2.5–7.4   | 4.7  | 3.6–5.7   |
| College degree or above                      | 5.4  | 3.2–7.7   | 5.6  | 3.2–8.1  | 4.5  | 2.6–6.3   | 3.9  | 1.9–6.0   | 8.2  | 5.3–11.1  | 5.9  | 4.8–7.0   |
| Occupation                                   |      |           |      |          |      |           |      |           |      |           |      |           |
| Gov. employee, teacher, healthcare provider  | 4.6  | 1.8–7.5   | 3.7  | 1.0–6.4  | 2.8  | 0.1–5.5   | 7.2  | 2.2–12.2  | 3.4  | 0.1–6.8   | 4.1  | 2.7–5.5   |
| Factory, business, service industry employee | 6.2  | 3.6–8.7   | 4.8  | 1.7–7.8  | 5.5  | 3.8–7.3   | 5.1  | 3.1–7.0   | 9.6  | 5.6–13.6  | 6.3  | 5.0–7.    |
| Not in the labor force <sup>1</sup>          | 3.1  | 1.4–4.8   | 4.3  | 2.9–5.8  | 2.6  | 1.7–3.5   | 2.6  | 1.3–4.0   | 5.1  | 2.7–7.5   | 3.8  | 3.0–4.6   |
| Current Smoking Status                       |      |           |      |          |      |           |      |           |      |           |      |           |
| Yes                                          | 17.2 | 12.3–22.2 | 14.7 | 8.7–20.6 | 14.4 | 11.1–17.8 | 15.5 | 10.7–20.4 | 23.1 | 15.9–30.3 | 17.1 | 14.5–19.7 |
| No                                           | 0.9  | 0.2–1.7   | 1.0  | 0.2–1.8  | 0.6  | 0.1–1.2   | 0.9  | 0.2–1.6   | 1.7  | 0.4–3.0   | 1.1  | 0.7–1.5   |
| Past-30-Day Use of ENDS                      |      |           |      |          |      |           |      |           |      |           |      |           |
| Total                                        | 0.7  | 0.3–1.2   | 0.6  | 0.1–1.0  | 1.0  | 0.5–1.4   | 0.9  | 0.4–1.4   | 1.7  | 0.2–3.1   | 0.9  | 0.6–1.3   |
| Sex                                          |      |           |      |          |      |           |      |           |      |           |      |           |
| Male                                         | 1.1  | 0.3–1.9   | 0.7  | 0.0–1.4  | 1.8  | 0.8–2.7   | 1.6  | 0.7–2.6   | 2.9  | 0.6–5.3   | 1.6  | 1.0–2.2   |
| Female                                       | 0.3  | 0.0–1.0   | 0.4  | 0.0–1.0  | 0.2  | 0.0–0.5   | 0.0  | 0.0–0.1   | 0.3  | 0.0–0.7   | 0.3  | 0.1–0.5   |
| Age (Years)                                  |      |           |      |          |      |           |      |           |      |           |      |           |
| 15–24                                        | 0.4  | 0.0–1.4   | 1.4  | 0.0–3.2  | 1.0  | 0.0–2.5   | 1.0  | 0.0–2.3   | 2.8  | 0.0–6.2   | 1.5  | 0.4–2.5   |
| 25–44                                        | 1.2  | 0.3–2.1   | 0.1  | 0.0–0.2  | 1.6  | 0.7–2.5   | 0.9  | 0.2–1.6   | 2.0  | 0.0–4.3   | 1.1  | 0.6–1.6   |
| 45–64                                        | 0.5  | 0.0–1.2   | 0.8  | 0.0–1.7  | 0.4  | 0.0–0.9   | 0.8  | 0.0–1.7   | 0.6  | 0.1–1.1   | 0.6  | 0.3–1.0   |
| 65 and above                                 | 0.0  |           | 0.0  |          | 0.7  | 0.0–1.6   | 0.0  |           | 0.2  | 0.0–0.5   | 0.2  | 0.0–0.4   |
| Education Level                              |      |           |      |          |      |           |      |           |      |           |      |           |
| Primary school completed or below            | 0.0  |           | 0.0  |          | 0.0  |           | 0.1  | 0.0–0.2   | 0.6  | 0.0–1.9   | 0.1  | 0.0–0.2   |
| Junior high school completed                 | 0.5  | 0.0–1.1   | 0.7  | 0.0–1.8  | 0.5  | 0.0–1.2   | 0.7  | 0.0–1.5   | 1.2  | 0.0–2.9   | 0.7  | 0.2–1.2   |

|                                              |     |         |     |         |     |         |     |         |     |          |     |         |
|----------------------------------------------|-----|---------|-----|---------|-----|---------|-----|---------|-----|----------|-----|---------|
| Senior high school completed                 | 1.4 | 0.0–2.9 | 1.3 | 0.1–2.4 | 0.9 | 0.1–1.7 | 0.8 | 0.1–1.6 | 0.5 | 0.0–1.1  | 1.0 | 0.5–1.4 |
| College degree or above                      | 0.7 | 0.0–1.4 | 0.2 | 0.0–0.4 | 1.5 | 0.6–2.5 | 1.3 | 0.2–2.5 | 2.6 | 0.0–5.2  | 1.3 | 0.6–1.9 |
| Occupation                                   |     |         |     |         |     |         |     |         |     |          |     |         |
| Gov. employee, teacher, healthcare provider  | 0.5 | 0.0–1.2 | 0.1 | 0.0–0.4 | 0.7 | 0.0–1.6 | 1.3 | 0.0–2.7 | 1.2 | 0.0–2.7  | 0.6 | 0.2–1.0 |
| Factory, business, service industry employee | 1.5 | 0.4–2.5 | 0.5 | 0.0–1.3 | 1.4 | 0.1–2.6 | 1.2 | 0.3–2.0 | 2.1 | 0.1–4.1  | 1.3 | 0.8–1.9 |
| Not in the labor force <sup>1</sup>          | 0.1 | 0.0–0.3 | 0.7 | 0.0–1.4 | 0.8 | 0.3–1.2 | 0.4 | 0.0–1.0 | 1.5 | 0.0–3.2  | 0.7 | 0.3–1.2 |
| Current Smoking Status                       |     |         |     |         |     |         |     |         |     |          |     |         |
| Yes                                          | 3.2 | 1.2–5.3 | 2.4 | 0.6–4.2 | 4.0 | 2.0–6.1 | 3.3 | 1.3–5.2 | 6.9 | 1.7–12.2 | 3.9 | 2.6–5.3 |
| No                                           | 0.0 |         | 0.0 |         | 0.1 | 0.0–0.3 | 0.1 | 0.0–0.3 | 0.1 | 0.0–0.2  | 0.0 | 0.0–0.1 |

<sup>1</sup> Respondents who were not in the labor force included students, homemakers, retired, and unemployed residents either able or unable to work.

**Table S2.** Adjusted<sup>1</sup> ORs of awareness, ever use, and past-30-day use of ENDS among adult residents in five Chinese cities in 2018.

| Indicators                                   | Chengdu |         | Chongqing |          | Wuhan |          | Xiamen |          | Xi'an |         | Overall |         |
|----------------------------------------------|---------|---------|-----------|----------|-------|----------|--------|----------|-------|---------|---------|---------|
|                                              | OR      | 95% CI  | OR        | 95% CI   | OR    | 95% CI   | OR     | 95% CI   | OR    | 95% CI  | OR      | 95% CI  |
| <b>Awareness</b>                             |         |         |           |          |       |          |        |          |       |         |         |         |
| <i>Sex</i>                                   |         |         |           |          |       |          |        |          |       |         |         |         |
| Male                                         | 1.4     | 0.9–2.1 | 1.0       | 0.7–1.5  | 1.5   | 1.1–2.0  | 1.6    | 1.0–2.6  | 1.7   | 1.0–2.7 | 1.4     | 1.1–1.6 |
| Female                                       | Ref.    |         | Ref.      |          | Ref.  |          | Ref.   |          | Ref.  |         | Ref.    |         |
| <i>Age Group</i>                             |         |         |           |          |       |          |        |          |       |         |         |         |
| 15–24                                        | 2.4     | 1.4–4.2 | 2.8       | 1.4–5.3  | 5.7   | 2.9–11.6 | 4.5    | 1.7–11.9 | 3.1   | 1.5–6.4 | 2.9     | 2.1–3.8 |
| 25–34                                        | 1.9     | 1.2–3.1 | 2.9       | 1.7–4.9  | 2.4   | 1.3–4.3  | 4.9    | 2.3–10.3 | 2.8   | 1.7–4.6 | 2.4     | 1.9–3.0 |
| 35–64                                        | 1.6     | 1.1–2.3 | 1.8       | 1.0–3.2  | 2.2   | 1.4–3.4  | 2.8    | 1.5–5.2  | 2.0   | 1.3–2.9 | 1.7     | 1.4–2.1 |
| 65 and above                                 | Ref.    |         | Ref.      |          | Ref.  |          | Ref.   |          | Ref.  |         | Ref.    |         |
| <i>Education</i>                             |         |         |           |          |       |          |        |          |       |         |         |         |
| Primary school completed or below            | Ref.    |         | Ref.      |          | Ref.  |          | Ref.   |          | Ref.  |         | Ref.    |         |
| Junior high school completed                 | 1.5     | 1.0–2.2 | 2.4       | 1.7–3.5  | 1.9   | 1.3–2.8  | 2.8    | 1.7–4.6  | 1.0   | 0.5–1.9 | 2.0     | 1.6–2.5 |
| Senior high school completed                 | 2.5     | 1.5–4.0 | 5.0       | 3.0–8.4  | 2.1   | 1.3–3.5  | 4.8    | 2.7–8.6  | 0.8   | 0.4–1.8 | 2.9     | 2.2–3.9 |
| College degree or above                      | 2.6     | 1.5–4.6 | 7.2       | 4.4–11.8 | 2.3   | 1.3–4.1  | 6.7    | 3.5–13.0 | 1.2   | 0.5–2.8 | 3.9     | 2.8–5.3 |
| <i>Occupation</i>                            |         |         |           |          |       |          |        |          |       |         |         |         |
| Gov. employee, teacher, healthcare provider  | 1.3     | 0.9–2.1 | 1.3       | 0.9–2.0  | 1.2   | 0.7–1.8  | 0.8    | 0.5–1.4  | 1.2   | 0.8–1.9 | 1.2     | 1.0–1.5 |
| Factory, business, service industry employee | 1.3     | 0.9–1.8 | 0.9       | 0.6–1.2  | 1.4   | 1.0–2.0  | 1.4    | 0.9–2.3  | 1.7   | 1.1–2.6 | 1.3     | 1.1–1.5 |
| Not in the labor force                       | Ref.    |         | Ref.      |          | Ref.  |          | Ref.   |          | Ref.  |         | Ref.    |         |
| <i>Current smoking status</i>                |         |         |           |          |       |          |        |          |       |         |         |         |
| Currently smoking                            | 2.5     | 1.6–4.0 | 2.0       | 1.4–2.8  | 2.4   | 1.9–3.1  | 2.6    | 1.6–4.1  | 2.5   | 1.7–3.6 | 2.3     | 1.9–2.7 |

|                                              |      |           |      |          |      |           |      |           |      |           |      |          |
|----------------------------------------------|------|-----------|------|----------|------|-----------|------|-----------|------|-----------|------|----------|
| Currently not smoking                        | Ref. |           | Ref. |          | Ref. |           | Ref. |           | Ref. |           | Ref. |          |
| Ever Use                                     |      |           |      |          |      |           |      |           |      |           |      |          |
| <i>Sex</i>                                   |      |           |      |          |      |           |      |           |      |           |      |          |
| Male                                         | 1.4  | 0.4–4.9   | 1.0  | 0.2–4.6  | 9.1  | 1.4–60.1  | 2.4  | 0.5–10.2  | 6.2  | 1.8–21.9  | 2.2  | 1.1–4.4  |
| Female                                       | Ref. |           | Ref. |          | Ref. |           | Ref. |           | Ref. |           | Ref. |          |
| <i>Age Group</i>                             |      |           |      |          |      |           |      |           |      |           |      |          |
| 15–24                                        | 0.8  | 0.2–3.7   | 2.3  | 0.6–9.7  | 8.9  | 3.0–26.8  | 7.9  | 0.9–72.3  | 4.8  | 1.4–16.9  | 2.8  | 1.5–5.5  |
| 25–34                                        | 0.9  | 0.3–3.0   | 1.3  | 0.3–4.7  | 3.7  | 1.2–11.1  | 3.6  | 0.4–37.4  | 3.1  | 1.1–8.5   | 1.7  | 1.0–3.0  |
| 35–64                                        | 0.8  | 0.3–2.1   | 1.3  | 0.3–4.8  | 2.2  | 0.7–7.2   | 2.1  | 0.2–25.9  | 2.0  | 0.8–5.3   | 1.3  | 0.7–2.4  |
| 65 and above                                 | Ref. |           | Ref. |          | Ref. |           | Ref. |           | Ref. |           | Ref. |          |
| <i>Education</i>                             |      |           |      |          |      |           |      |           |      |           |      |          |
| Primary school completed or below            | Ref. |           | Ref. |          | Ref. |           | Ref. |           | Ref. |           | Ref. |          |
| Junior high school completed                 | 9.8  | 0.9–107.8 | 1.7  | 0.4–6.7  | 1.5  | 0.3–8.2   | 11.5 | 1.4–93.8  | 1.8  | 0.6–6.2   | 2.8  | 1.3–6.0  |
| Senior high school completed                 | 8.1  | 0.9–76.1  | 1.5  | 0.4–6.0  | 0.8  | 0.2–4.2   | 31.5 | 6.0–165.6 | 0.8  | 0.2–2.9   | 2.4  | 1.1–5.0  |
| College degree or above                      | 12.8 | 1.1–150.2 | 3.4  | 0.8–14.6 | 1.4  | 0.3–7.2   | 18.1 | 2.0–160.9 | 2.2  | 0.7–6.9   | 4.4  | 2.1–9.2  |
| <i>Occupation</i>                            |      |           |      |          |      |           |      |           |      |           |      |          |
| Gov. employee, teacher, healthcare provider  | 1.0  | 0.4–2.1   | 0.6  | 0.3–1.6  | 1.1  | 0.4–3.1   | 4.2  | 1.2–15.4  | 0.5  | 0.2–1.3   | 0.8  | 0.5–1.2  |
| Factory, business, service industry employee | 1.2  | 0.5–2.9   | 0.9  | 0.4–2.0  | 1.3  | 0.7–2.4   | 1.8  | 0.7–4.9   | 1.2  | 0.6–2.4   | 1.1  | 0.8–1.5  |
| Not in the labor force                       | Ref. |           | Ref. |          | Ref. |           | Ref. |           | Ref. |           | Ref. |          |
| <i>Current smoking status</i>                |      |           |      |          |      |           |      |           |      |           |      |          |
| Currently smoking                            | 19.1 | 5.1–72.1  | 18.9 | 5.8–62.3 | 16.4 | 6.4–41.9  | 19.7 | 8.7–44.4  | 11.2 | 4.7–27.0  | 15.5 | 9.1–26.4 |
| Currently not smoking                        | Ref. |           | Ref. |          | Ref. |           | Ref. |           | Ref. |           | Ref. |          |
| Past-30-Day Use                              |      |           |      |          |      |           |      |           |      |           |      |          |
| <i>Sex</i>                                   |      |           |      |          |      |           |      |           |      |           |      |          |
| Male                                         | 0.3  | 0.0–2.7   | 0.2  | 0.0–1.3  | 0.5  | 0.13–2.03 | 7.4  | 0.4–133.0 | 0.2  | 0.0–2.1   | 0.4  | 0.2–1.1  |
| Female                                       | Ref. |           | Ref. |          | Ref. |           | Ref. |           | Ref. |           | Ref. |          |
| <i>Age Group</i>                             |      |           |      |          |      |           |      |           |      |           |      |          |
| 15–24                                        | NA   | NA        | NA   | NA       | 0.8  | 0.14–4.77 | NA   | NA        | 16.4 | 0.9–304.0 | 4.5  | 1.1–18.7 |
| 25–34                                        | NA   | NA        | NA   | NA       | 0.9  | 0.2–4.26  | NA   | NA        | 4.2  | 0.3–71.8  | 2.1  | 0.6–7.4  |
| 35–64                                        | NA   | NA        | NA   | NA       | 0.3  | 0.03–1.76 | NA   | NA        | 1.3  | 0.1–20.0  | 1.3  | 0.4–4.7  |
| 65 and above                                 | Ref. |           | Ref. |          | Ref. |           | Ref. |           | Ref. |           | Ref. |          |
| <i>Education</i>                             |      |           |      |          |      |           |      |           |      |           |      |          |
| Primary school completed or below            | Ref. |           | Ref. |          | Ref. |           | Ref. |           | Ref. |           | Ref. |          |
| Junior high school completed                 | NA   | NA        | NA   | NA       | NA   | NA        | 5.4  | 0.3–115.8 | 21.2 | 0.5–949.6 | 6.8  | 1.1–41.6 |
| Senior high school completed                 | NA   | NA        | NA   | NA       | NA   | NA        | 9.0  | 0.6–137.8 | 2.9  | 0.1–64.3  | 7.5  | 1.2–45.5 |
| College degree or above                      | NA   | NA        | NA   | NA       | NA   | NA        | 21.8 | 1.4–348.5 | 34.4 | 1.3–922.3 | 14.3 | 2.9–71.5 |
| <i>Occupation</i>                            |      |           |      |          |      |           |      |           |      |           |      |          |
| Gov. employee, teacher, healthcare provider  | 4.4  | 0.3–79.8  | 0.1  | 0.0–1.4  | 0.7  | 0.14–2.93 | 1.8  | 0.1–41.8  | 0.8  | 0.2–3.5   | 0.5  | 0.2–1.5  |

|                                              |      |          |      |         |      |              |      |           |      |         |       |            |
|----------------------------------------------|------|----------|------|---------|------|--------------|------|-----------|------|---------|-------|------------|
| Factory, business, service industry employee | 8.9  | 0.8–95.2 | 0.6  | 0.1–4.2 | 1.0  | 0.3–3.57     | 1.9  | 0.2–20.2  | 1.1  | 0.5–2.6 | 1.1   | 0.6–2.0    |
| Not in the labor force                       | Ref. |          | Ref. |         | Ref. |              | Ref. |           | Ref. |         | Ref.  |            |
| <i>Current smoking status</i>                |      |          |      |         |      |              |      |           |      |         |       |            |
| Currently smoking                            | NA   | NA       | NA   | NA      | 92.1 | 17.56–483.21 | 19.1 | 2.6–141.8 | NA   | NA      | 198.7 | 52.3–754.4 |
| Currently not smoking                        | Ref. |          | Ref. |         | Ref. |              | Ref. |           | Ref. |         | Ref.  |            |

<sup>1</sup> Controlling gender, age, education, occupation, and smoking status.

**Table S3.** Awareness, ever use, and past-30-day use of ENDS among adult smokers in five Chinese cities in 2018.

| Demographic Characteristics                  | Chengdu<br>(N = 414) |           | Chongqing<br>(N = 399) |           | Wuhan<br>(N = 521) |            | Xiamen<br>(N = 490) |            | Xi'an<br>(N = 515) |            | Overall<br>(N = 2339) |           |
|----------------------------------------------|----------------------|-----------|------------------------|-----------|--------------------|------------|---------------------|------------|--------------------|------------|-----------------------|-----------|
|                                              | %                    | 95% CI    | %                      | 95% CI    | %                  | 95% CI     | %                   | 95% CI     | %                  | 95% CI     | %                     | 95% CI    |
| <b>Awareness of ENDS</b>                     |                      |           |                        |           |                    |            |                     |            |                    |            |                       |           |
| Total                                        | 75.5                 | 67.2–83.7 | 56.0                   | 46.5–65.5 | 65.3               | 56.9–73.6  | 65.2                | 56.7–73.7  | 78.9               | 71.6–86.1  | 67.8                  | 63.2–72.4 |
| <b>Sex</b>                                   |                      |           |                        |           |                    |            |                     |            |                    |            |                       |           |
| Male                                         | 74.9                 | 66.2–83.5 | 55.4                   | 45.9–65.0 | 66.0               | 57.5–74.5  | 65.0                | 56.6–73.4  | 78.8               | 71.8–85.8  | 67.6                  | 62.9–72.2 |
| Female                                       | 80.8                 | 71.8–89.8 | 64.9                   | 47.9–82.0 | 50.8               | 30.4–71.1  | 70.6                | 53.5–87.6  | 80.9               | 61.6–100.0 | 71.7                  | 64.2–79.1 |
| <b>Age (Years)</b>                           |                      |           |                        |           |                    |            |                     |            |                    |            |                       |           |
| 15–24                                        | 91.4                 | 83.2–99.6 | 84.8                   | 69.9–99.7 | 88.6               | 73.6–100.0 | 76.0                | 50.5–100.0 | 80.6               | 65.1–96.1  | 84.3                  | 77.3–91.2 |
| 25–44                                        | 78.0                 | 67.8–88.2 | 61.9                   | 51.8–72.1 | 73.3               | 63.1–83.5  | 77.9                | 70.1–85.8  | 87.7               | 80.5–94.9  | 75.3                  | 70.2–80.3 |
| 45–64                                        | 67.7                 | 56.0–79.4 | 48.6                   | 35.2–62.0 | 61.7               | 52.9–70.5  | 42.9                | 30.9–55.0  | 73.3               | 65.8–80.8  | 59.7                  | 53.4–66.0 |
| 65 and above                                 | 63.2                 | 47.0–79.4 | 15.9                   | 3.7–28.1  | 40.6               | 27.9–53.4  | 21.9                | 7.6–36.1   | 47.1               | 32.3–61.8  | 36.3                  | 27.4–45.3 |
| <b>Education Level</b>                       |                      |           |                        |           |                    |            |                     |            |                    |            |                       |           |
| Primary school completed or below            | 69.7                 | 55.8–83.7 | 10.2                   | 1.1–19.4  | 36.1               | 18.3–53.9  | 29.3                | 17.4–41.1  | 71.2               | 45.6–96.8  | 36.2                  | 25.4–47.0 |
| Junior high school completed                 | 65.2                 | 52.4–78.1 | 49.0                   | 35.4–62.7 | 64.5               | 49.1–79.9  | 58.5                | 46.4–70.6  | 76.7               | 66.9–86.5  | 60.0                  | 52.9–67.0 |
| Senior high school completed                 | 77.0                 | 65.8–88.2 | 63.0                   | 50.2–75.8 | 65.8               | 56.2–75.4  | 78.9                | 65.5–92.3  | 71.3               | 58.8–83.8  | 69.9                  | 64.3–75.4 |
| College degree or above                      | 79.9                 | 70.2–89.6 | 69.9                   | 59.8–80.0 | 73.6               | 63.2–84.0  | 86.5                | 72.9–100.0 | 87.6               | 81.7–93.4  | 79.1                  | 74.0–84.2 |
| <b>Occupation</b>                            |                      |           |                        |           |                    |            |                     |            |                    |            |                       |           |
| Gov. employee, teacher, healthcare provider  | 68.8                 | 49.6–88.0 | 76.5                   | 57.6–95.5 | 62.0               | 41.8–82.1  | 52.7                | 31.2–74.2  | 80.2               | 66.2–94.2  | 70.2                  | 60.9–79.4 |
| Factory, business, service industry employee | 80.6                 | 71.7–89.6 | 55.5                   | 45.7–65.2 | 72.6               | 62.3–82.8  | 73.6                | 64.1–83.1  | 84.9               | 78.6–91.1  | 74.3                  | 69.4–79.2 |
| Not in the labor force <sup>1</sup>          | 69.6                 | 59.6–79.7 | 53.2                   | 42.4–64.0 | 59.4               | 50.2–68.5  | 57.1                | 46.1–68.1  | 72.1               | 62.3–81.8  | 61.3                  | 55.9–66.6 |
| <b>Ever Use of ENDS</b>                      |                      |           |                        |           |                    |            |                     |            |                    |            |                       |           |
| Total                                        | 17.2                 | 12.5–21.9 | 14.7                   | 9.0–20.3  | 14.4               | 11.2–17.6  | 15.5                | 11.0–20.1  | 23.1               | 16.2–29.9  | 17.1                  | 14.5–19.6 |
| <b>Sex</b>                                   |                      |           |                        |           |                    |            |                     |            |                    |            |                       |           |
| Male                                         | 16.5                 | 12.2–20.9 | 14.1                   | 7.9–20.4  | 15.1               | 11.8–18.3  | 15.5                | 10.6–20.4  | 23.6               | 16.2–31.1  | 17.0                  | 14.3–19.7 |
| Female                                       | 23.2                 | 6.1–40.2  | 22.4                   | 2.1–42.7  | 1.7                | 0.0–5.1    | 16.4                | 0.0–38.8   | 12.0               | 0.0–30.9   | 18.0                  | 8.4–27.6  |
| <b>Age (Years)</b>                           |                      |           |                        |           |                    |            |                     |            |                    |            |                       |           |
| 15–24                                        | 22.9                 | 10.3–35.6 | 24.3                   | 10.2–38.4 | 41.3               | 25.7–56.8  | 29.5                | 6.0–52.9   | 26.0               | 7.8–44.1   | 26.6                  | 18.8–34.4 |



|                                              |      |          |      |          |      |          |      |           |      |          |      |          |
|----------------------------------------------|------|----------|------|----------|------|----------|------|-----------|------|----------|------|----------|
| <i>Sex</i>                                   |      |          |      |          |      |          |      |           |      |          |      |          |
| Male                                         | 0.7  | 0.4–1.4  | 0.7  | 0.3–1.9  | 1.1  | 0.5–2.9  | 0.5  | 0.3–1.1   | 0.7  | 0.2–2.1  | 0.6  | 0.4–1.0  |
| Female                                       | Ref. |          | Ref. |          | Ref. |          | Ref. |           | Ref. |          | Ref. |          |
| <i>Age Group</i>                             |      |          |      |          |      |          |      |           |      |          |      |          |
| 15–24                                        | 4.7  | 1.2–19.0 | 15.1 | 3.0–76.3 | 7.3  | 1.2–44.1 | 4.6  | 0.7–29.2  | 4.1  | 0.9–18.9 | 5.1  | 2.5–10.5 |
| 25–34                                        | 1.6  | 0.6–4.3  | 5.0  | 1.5–17.1 | 2.6  | 1.1–6.2  | 6.2  | 1.9–21.1  | 5.1  | 1.5–17.1 | 2.9  | 1.9–4.4  |
| 35–64                                        | 1.1  | 0.5–2.4  | 4.6  | 1.4–15.0 | 1.8  | 0.9–3.5  | 1.9  | 0.7–5.2   | 2.7  | 1.1–6.3  | 1.9  | 1.3–2.8  |
| 65 and above                                 | Ref. |          | Ref. |          | Ref. |          | Ref. |           | Ref. |          | Ref. |          |
| <i>Education</i>                             |      |          |      |          |      |          |      |           |      |          |      |          |
| Primary school completed or below            | Ref. |          | Ref. |          | Ref. |          | Ref. |           | Ref. |          | Ref. |          |
| Junior high school completed                 | 0.8  | 0.3–1.9  | 6.4  | 2.3–17.9 | 2.1  | 0.8–5.6  | 1.6  | 0.8–3.3   | 1.2  | 0.5–2.9  | 2.2  | 1.5–3.3  |
| Senior high school completed                 | 1.2  | 0.6–2.6  | 9.8  | 3.1–31.4 | 2.1  | 0.9–4.9  | 4.3  | 1.8–10.1  | 0.6  | 0.2–1.7  | 2.9  | 1.9–4.5  |
| College degree or above                      | 1.2  | 0.5–3.3  | 12.6 | 3.3–48.3 | 2.4  | 0.8–7.3  | 6.7  | 1.8–25.3  | 1.5  | 0.5–4.8  | 4.2  | 2.7–6.6  |
| <i>Occupation</i>                            |      |          |      |          |      |          |      |           |      |          |      |          |
| Gov. employee, teacher, healthcare provider  | 0.7  | 0.3–1.7  | 1.4  | 0.5–3.7  | 0.9  | 0.4–2.2  | 0.9  | 0.3–2.3   | 1.2  | 0.4–3.8  | 1.0  | 0.7–1.6  |
| Factory, business, service industry employee | 1.3  | 0.7–2.7  | 0.9  | 0.5–1.6  | 1.2  | 0.7–2.1  | 1.2  | 0.4–3.1   | 1.6  | 0.9–2.9  | 1.3  | 1.0–1.7  |
| Not in the labor force                       | Ref. |          | Ref. |          | Ref. |          | Ref. |           | Ref. |          | Ref. |          |
| <i>Ever Use</i>                              |      |          |      |          |      |          |      |           |      |          |      |          |
| <i>Sex</i>                                   |      |          |      |          |      |          |      |           |      |          |      |          |
| Male                                         | 0.6  | 0.2–1.7  | 0.4  | 0.1–2.0  | 8.3  | 0.7–94.7 | 0.9  | 0.1–11.7  | 1.4  | 0.2–8.4  | 0.8  | 0.4–1.6  |
| Female                                       | Ref. |          | Ref. |          | Ref. |          | Ref. |           | Ref. |          | Ref. |          |
| <i>Age Group</i>                             |      |          |      |          |      |          |      |           |      |          |      |          |
| 15–24                                        | 1.2  | 0.2–6.8  | 2.5  | 0.6–10.9 | 11.7 | 2.9–47.2 | 6.2  | 0.5–71.5  | 6.1  | 1.3–29.4 | 3.3  | 1.6–6.6  |
| 25–34                                        | 1.1  | 0.3–4.8  | 1.0  | 0.2–5.2  | 3.6  | 1.1–12.2 | 3.4  | 0.4–30.0  | 6.3  | 1.3–29.5 | 2.1  | 1.1–4.0  |
| 35–64                                        | 0.8  | 0.2–2.9  | 1.3  | 0.3–5.6  | 2.0  | 0.5–7.4  | 1.9  | 0.2–21.7  | 3.2  | 0.8–13.1 | 1.5  | 0.8–2.8  |
| 65 and above                                 | Ref. |          | Ref. |          | Ref. |          | Ref. |           | Ref. |          | Ref. |          |
| <i>Education</i>                             |      |          |      |          |      |          |      |           |      |          |      |          |
| Primary school completed or below            | Ref. |          | Ref. |          | Ref. |          | Ref. |           | Ref. |          | Ref. |          |
| Junior high school completed                 | 6.6  | 0.6–80.0 | 3.4  | 0.7–16.8 | 1.0  | 0.2–6.6  | 10.6 | 1.7–88.3  | 4.4  | 0.9–22.1 | 3.9  | 1.7–9.2  |
| Senior high school completed                 | 6.9  | 0.7–72.5 | 2.4  | 0.4–13.8 | 0.8  | 0.1–4.3  | 23.6 | 3.7–149.3 | 1.8  | 0.4–8.2  | 3.3  | 1.4–7.9  |
| College degree or above                      | 10.1 | 0.7–14.4 | 8.8  | 1.6–48.4 | 1.3  | 0.2–7.4  | 21.5 | 2.7–168.2 | 5.0  | 1.3–20.0 | 6.9  | 3.0–15.9 |
| <i>Occupation</i>                            |      |          |      |          |      |          |      |           |      |          |      |          |
| Gov. employee, teacher, healthcare provider  | 1.1  | 0.4–2.6  | 0.5  | 0.2–1.2  | 1.1  | 0.4–2.8  | 3.6  | 0.9–15.2  | 0.3  | 0.1–1.0  | 0.7  | 0.5–1.1  |
| Factory, business, service industry employee | 1.1  | 0.4–2.7  | 1.0  | 0.4–2.3  | 1.3  | 0.6–2.5  | 1.7  | 0.6–5.1   | 0.8  | 0.5–1.3  | 1.0  | 0.7–1.4  |
| Not in the labor force                       | Ref. |          | Ref. |          | Ref. |          | Ref. |           | Ref. |          | Ref. |          |
| <i>Past-30-Day Use</i>                       |      |          |      |          |      |          |      |           |      |          |      |          |
| <i>Sex</i>                                   |      |          |      |          |      |          |      |           |      |          |      |          |
| Male                                         | 0.3  | 0.0–2.7  | 0.2  | 0.0–1.3  | 1.1  | 0.1–9.5  | 1.0  | 0.1–12.9  | 0.2  | 0.0–4.1  | 0.4  | 0.1–1.0  |



|                                              |      |          |      |         |      |         |      |           |      |           |      |          |
|----------------------------------------------|------|----------|------|---------|------|---------|------|-----------|------|-----------|------|----------|
| Female                                       | Ref. |          | Ref. |         | Ref. |         | Ref. |           | Ref. |           | Ref. |          |
| <i>Age Group</i>                             |      |          |      |         |      |         |      |           |      |           |      |          |
| 15–24                                        | NA   | NA       | NA   | NA      | 0.4  | 0.1–3.4 | NA   | NA        | 16.8 | 0.9–323.9 | 4.4  | 1.1–18.7 |
| 25–34                                        | NA   | NA       | NA   | NA      | 1.1  | 0.2–4.8 | NA   | NA        | 3.8  | 0.2–67.5  | 2.0  | 0.6–7.0  |
| 35–64                                        | NA   | NA       | NA   | NA      | 0.3  | 0.0–1.8 | NA   | NA        | 1.3  | 0.1–20.9  | 1.3  | 0.4–4.6  |
| 65 and above                                 | Ref. |          | Ref. |         | Ref. |         | Ref. |           | Ref. |           | Ref. |          |
| <i>Education</i>                             |      |          |      |         |      |         |      |           |      |           |      |          |
| Primary school completed or below            | Ref. |          | Ref. |         | Ref. |         | Ref. |           | Ref. |           | Ref. |          |
| Junior high school completed                 | NA   | NA       | NA   | NA      | NA   | NA      | 4.5  | 0.2–121.8 | NA   | NA        | 7.0  | 1.1–43.4 |
| Senior high school completed                 | NA   | NA       | NA   | NA      | NA   | NA      | 5.7  | 0.3–118.9 | 2.8  | 0.1–76.4  | 7.5  | 1.2–46.1 |
| College degree or above                      | NA   | NA       | NA   | NA      | NA   | NA      | 19.9 | 1.0–381.2 | NA   | NA        | 14.6 | 2.9–74.2 |
| <i>Occupation</i>                            |      |          |      |         |      |         |      |           |      |           |      |          |
| Gov. employee, teacher, healthcare provider  | 4.4  | 0.2–81.8 | 0.1  | 0.0–1.4 | 0.6  | 0.1–2.8 | 1.6  | 0.0–105.3 | 0.5  | 0.1–3.3   | 0.4  | 0.1–1.3  |
| Factory, business, service industry employee | 8.9  | 0.8–97.2 | 0.6  | 0.1–4.3 | 0.9  | 0.2–3.1 | 3.1  | 0.3–37.4  | 1.1  | 0.5–2.7   | 1.1  | 0.6–2.0  |
| Not in the labor force                       | Ref. |          | Ref. |         | Ref. |         | Ref. |           | Ref. |           | Ref. |          |

<sup>1</sup> Controlling gender, age, education, and occupation.
